# Supplementary material for: Comparative Study on the Expression Levels of Antithrombotic Genes in Five Sympatrically Distributed Leech Species
Source: Research Square preprint supplement (doi:10.21203/rs.3.rs-7572984/v1), 2025-11-04
Supplement: Supplementary file 1 [file 36814624c1e83e6ffa3367da.xlsx]

## Sheet: Sheet1
Table S4. TPM values of 86 genes in 12 Hirudo nipponia samples
	TPM
Genes	Hnip 01	Hnip 02	Hnip 03	Hnip 04	Hnip 05	Hnip 06	Hnip 07	Hnip 08	Hnip 09	Hnip 10	Hnip 11	Hnip 12
antistasin_Hnip1	408.985	12.7103	109.764	72.7642	87.8622	46.7921	114.213	372.677	374.357	74.7456	35.5288	57.7226
antistasin_Hnip2	1246.41	481.799	676.406	794.649	343.302	530.883	620.722	596.755	534.925	308.629	343.186	1171.34
apyrase_Hnip1	0	0	0	0	0.030956	0	0	0.022754	0	0	0	0
apyrase_Hnip2	26.7248	22.6069	25.6983	13.8511	2.7017	15.6466	18.1352	15.3425	63.199	8.86498	16.4085	9.23433
apyrase_Hnip3	451.32	105.216	170.281	267.07	129.435	219.527	553.169	639.934	304.374	16.1071	0.344858	130.849
apyrase_Hnip4	64.9741	28.9517	26.0072	36.0525	46.9421	24.6556	24.7762	28.1981	21.6591	13.1472	30.6111	41.9942
apyrase_Hnip5	482.67	98.8857	148.988	218.223	198.159	236.272	456.188	165.172	582.498	25.185	14.6428	101.873
apyrase_Hnip6	9.07176	8.1848	8.84718	7.47971	11.3961	8.23505	7.87532	8.88122	8.54702	8.16752	10.1342	11.7866
bdellastasin_Hnip	2364.18	2577.28	1715.07	2240.43	1242	1713.28	1685.69	1764.67	2423.38	1553.62	2176.8	2143.93
bdellin_Hnip1	4205.71	5289.7	5956.06	3506.66	4951.07	2681.75	1230.15	2994.59	3066.19	2299.8	6076.02	18534.6
bdellin_Hnip2	144.862	52.1296	159.736	56.8081	196.962	63.1587	69.1232	120.17	99.4716	59.8553	237.828	1216.09
bdellin_Hnip3	145.174	136.679	240.001	188.26	239.919	79.6166	33.9157	120.026	97.4661	115.195	279.319	745.215
decorsin_Hnip1	1433.73	2074.32	1634.7	1226.62	1314.07	4113.66	0	3769.55	7010.22	133.215	840.99	3.17603
decorsin_Hnip2	36316.9	10541.6	9421.56	17937.6	9947.25	9309.15	48832.2	41476.4	23522.1	1800.97	3309.35	4703.51
decorsin_Hnip3	1.24375	4.99765	5.14004	3.65539	1.32985	1523.65	0	1.42501	4560.52	0	1235.25	7.38863
destabilase_Hnip1	2083.06	1418.28	1862.71	1123.92	3070.03	1136.26	597.534	883.568	3076.54	212.999	1278.71	1055.22
destabilase_Hnip2	9897.43	4097.75	2144.17	396.363	2802.38	1720.64	247.759	928.333	1306.61	4191.63	3560.91	2640.77
destabilase_Hnip3	0	0	0	0	0	0	0	0	0	0	0	0
destabilase_Hnip4	1.61269	6.40484	1.10482	1.95285	1.83314	0.539214	1.71717	2.0318	1.80883	0.443321	0.585036	0.494074
eglin_Hnip1	102.977	270.747	93.8971	108.005	344.867	104.914	32.7451	112.551	39.7342	114.187	121.98	402.093
eglin_Hnip2	171.698	220.055	350.719	88.1863	343.805	560.277	236.148	163.513	190.7	109.708	424.82	738.082
eglin_Hnip3	0	1.57758	0	0	16.6264	0.903622	0.334116	0.308122	0.388936	0	3.60699	0.935509
eglin_Hnip4	1188.69	880.298	741.271	831.594	1880.22	388.386	871.433	2908.35	959.885	387.858	1386.38	1391.5
eglin_Hnip5	996.666	863.786	360.283	974.417	1037.31	416.827	755.549	843.385	937.575	294.215	700.866	1177.32
GGT_Hnip1	0.120716	0.662175	0.39602	1.15327	0.522879	0.54579	0.970435	0.448831	0.375465	0.492877	0.602489	0.747446
GGT_Hnip2	97.0169	190.67	296.183	81.1489	70.9794	507.62	47.236	32.7389	120.768	522.502	477.118	150.239
GGT_Hnip3	24.8756	38.6036	55.4272	57.7216	15.9433	63.8967	25.5805	20.0914	6.71568	6.62295	28.1568	59.7405
GGT_Hnip4	11.3714	5.95851	5.09625	1.43811	11.6483	14.688	6.76989	3.94887	19.3377	51.5887	56.2885	0.969521
guamerin_Hnip1	754.122	485.728	1218.74	604.956	511.655	407.96	698.708	938.438	499.747	114.896	834.991	2115.92
guamerin_Hnip2	0	4.33251	1.88828	7.4481	4.51197	2.12474	0.78494	0.725201	5.49337	1.57499	0.943045	0.550541
guamerin_Hnip3	80.8897	1560.88	1495.07	36.2431	251.665	453.709	91.6746	65.3421	34.0909	0.75573	360.473	2201
guamerin_Hnip4	320.297	57.4558	155.149	189.799	21.7315	234.292	64.2271	172.034	36.7924	733.319	286.593	2780.88
guamerin_Hnip5	1991.28	3400	3644.07	2838.89	2533.76	2084.78	969.504	716.117	1224.2	1800.03	3025.4	5124.14
guamerin_Hnip6	933.81	741.961	924.702	635.187	490.807	306.662	140.829	190.823	65.2987	537.169	649.954	387.657
guamerin_Hnip7	1732.81	1356.72	2194	1419.25	1239.73	896.846	399.268	541.062	148.963	985.702	1769.43	1559.49
guamerin_Hnip8	461.626	1117.14	370.327	705.398	374.44	444.941	532.086	440.191	392.325	155.838	685.196	1260.35
hirudin_Hnip1	313.422	89.9483	170.688	145.081	187.599	243.348	36.2144	1275.59	95.9103	36.3757	202.708	207.378
hirudin_Hnip2	10821.2	2382.68	4020.72	5821.82	4159.55	2270	6031.26	12145.5	10294.8	678.522	1365.66	4393.88
hirudin_Hnip3	255.726	43.7589	233.115	59.1465	48.4452	54.703	123.628	332.144	53.6332	73.4869	133.984	99.1892
hirustasin_Hnip1	2283.01	4747.77	2465.95	2680.27	1421.37	1944.89	2333.05	3356.45	2725.44	831.207	3308.48	7225.15
hirustasin_Hnip2	485.274	897.384	1024.75	561.388	200.365	933.264	211.389	682.003	282.309	532.334	1390.57	1149.16
hirustasin_Hnip3	140.71	167.426	54.4786	163.186	62.0453	89.7599	22.2506	56.3262	57.53	78.8546	183.218	252.131
hirustasin_Hnip4	469.871	1206.45	451.304	693.511	364.279	513.304	650.553	579.669	555.628	328.665	1083.84	1724.9
hirustasin_like_Hnip1	71.372	117.995	53.1363	169.195	25.7749	48.3333	145.221	210.218	52.9805	16.8888	59.0936	15.9335
hirustasin_like_Hnip2	159.17	19.1519	18.6466	37.1969	134.595	0	33.486	77.0833	32.2197	0	51.101	0
hirustasin_like_Hnip3	2204.56	829.895	461.08	1078.37	2026.17	116.623	224.627	938.119	351.778	118.136	1122.61	111.285
HMEI_Hnip01	529.653	42.0257	84.878	332.585	424.904	13.0153	1116.7	460.435	929.583	11.8992	150.607	0.655955
HMEI_Hnip02	3544.04	1051.74	1585.26	2139.2	2782.92	5.90622	5417.09	4505.06	5863.92	6.89419	756.854	0.22372
HMEI_Hnip03	8193.02	692.588	1228.19	2517.97	3766.86	0.530812	3381.9	4557.2	4730.2	0.851975	1492.61	0
HMEI_Hnip04	0.093873	309.249	0.567595	0.135141	0	0	0.23504	1.91095	0	0	578.587	0
HMEI_Hnip05	139.742	14.8684	6.02933	55.4682	33.5855	0	26.4314	57.3413	134.234	0	12.9362	0
HMEI_Hnip06	2431.51	894.302	502.199	864.259	1134.51	0.100393	1620.85	1303.93	1990.81	0.10072	712.666	0
HMEI_Hnip07	4.95665	0.980727	0.369367	1.71768	1.19246	0.415129	1.75681	2.93391	1.08048	0.312376	0.748879	0
HMEI_Hnip08	1407.97	1001.94	441.947	1150.9	2305.57	0.622693	1705.99	689.326	831.97	4.68564	550.878	0.756681
HMEI_Hnip09	1682.53	45.1903	372.324	113.019	269.083	93.6662	511.027	384.231	857.496	14.8059	84.5997	26.5597
HMEI_Hnip10	54.9486	1.83755	12.8949	2.60006	1.95488	2.04098	5.43556	30.8483	25.7015	1.65782	1.57889	1.72105
HMEI_Hnip11	171.68	60.2538	65.6877	74.9195	281.388	24.797	125.671	133.016	135.798	12.6907	112.679	8.05157
HMEI_Hnip12	10.6208	900.188	506.7	294.53	195.165	2141.78	35.4998	1.41544	420.988	3726.63	520.841	34.207
HMEI_Hnip13	57.8189	98.188	57.937	82.0741	40.5852	42.9837	22.6401	51.4002	58.1236	27.0851	91.0538	133.02
HMEI_Hnip14	0	0	0.54798	0.13067	0	0	0.075532	0	0	0	0	0
HMEI_Hnip15	3545.58	783.109	853.617	1090	1983.91	0.311347	2907.7	1870.31	2685.8	0.728877	965.767	0.108097
HMEI_Hnip16	4.07474	0	0.102446	0	0.441298	0.807126	0	0	0.099992	0.346917	3.22072	0.480417
HMEI_Hnip17	3746	63.7753	480.637	0.286411	612.759	2264.94	6.62964	1.39592	945.141	3410.46	2065.49	181.733
HMEI_Hnip18	294.793	10.4598	81.3555	0	94.2862	603.777	0.087039	0.244178	148.284	386.482	368.096	35.5786
HMEI_Hnip19	16.4359	84.2743	15.401	25.6149	8.84494	18.1839	39.2202	58.4377	14.7123	1.64335	26.7047	37.0537
HMEI_Hnip20	5274.39	135.927	1436.46	0	851.47	5661.51	7.38805	2.42352	1857.71	5126.99	4445.89	565.283
HMEI_Hnip21	290.671	8.54051	66.5706	0	39.6472	164.354	0.171917	0	75.7144	203.445	187.178	25.656
hyaluronidase_Hnip1	10.4831	17.1266	10.5306	9.23101	4.00544	7.24711	9.73632	47.7572	9.39971	10.2599	6.71677	9.987
hyaluronidase_Hnip2	11.7435	13.3933	15.5111	15.5284	15.9299	18.0746	19.9998	15.3986	10.3416	6.50623	26.7176	9.60097
hyaluronidase_Hnip3	27.3776	37.706	45.0594	53.4078	38.1543	30.7402	46.9164	42.4734	34.8998	19.4859	33.9754	40.095
hyaluronidase_Hnip4	306.683	7.01532	93.5478	25.0376	32.0108	36.7122	118.055	378.415	150.205	9.83415	11.6673	11.8348
LCI_Hnip	582.109	1819.49	975.294	1458.16	653.232	2669.21	702.42	516.706	1292.32	5262.58	1358.46	912.7
LDTI_Hnip	1099.44	454.087	445.546	294.365	403.708	407.618	350.457	702.596	291.64	248.75	541.684	496.68
lefaxin_Hnip1	1548.99	3169.59	2224.46	2748.64	2139.89	1157.34	2062.47	2813.95	1249.77	1266.89	2165.03	1718.79
lefaxin_Hnip2	3033.3	10340.8	8725.07	7042.39	9596.83	6787.11	2522.47	4692.61	4092.81	7047.75	9131.16	9234.8
lefaxin_Hnip3	63.5945	84.1267	84.0559	116.801	85.4705	81.8296	83.5955	92.8288	86.9275	60.3174	87.7613	77.7462
lumbrokinase_Hnip1	0	0.053673	0	0	0	0.045211	0	0.0316	0	0	0	0.047311
lumbrokinase_Hnip2	0	0	0	0	0.043229	0	0	0	0	0	0.041232	0
lumbrokinase_Hnip3	0.079752	0	0.285491	0.578071	0.172019	0.044979	0.464807	0.314397	0.157882	0.090927	0.328169	0.094136
piguamerin_Hnip1	213.2	1275	1906.67	352.54	469.059	316.86	94.8624	82.8225	129.306	785.07	1262.08	2536.32
piguamerin_Hnip2	711.524	563.171	709.37	398.097	306.287	477.946	252.071	428.229	53.0949	426.126	342.842	4408.27
piguamerin_Hnip3	203.767	513.166	577.509	568.971	164.495	158.961	61.5645	98.5405	83.9215	214.322	1048.8	1238.14
progranulin_Hnip	87.7879	82.4623	178.71	126.031	117.243	80.7796	122.704	117.872	118.128	38.99	100.074	152.851
saratin_Hnip1	8281.29	2082.14	1.09975	0.335396	2827.09	3817.71	16980.7	2.79064	1.18965	0	718.855	1076.71
saratin_Hnip2	24030.6	5995.78	10896.5	7602.52	5206.54	3961.8	17266.9	25636.3	26441.1	811.828	746.654	4955.42
therostasin_Hnip	2.9061	653.93	329.659	124.071	86.5444	811.239	23.0841	3.23949	132.085	2176.55	568.845	56.9503
Note: TPM, transcripts per million; Hirudo nipponia 01-12,Wacr 01-12.
