# Supplementary material for: Comparative Study on the Expression Levels of Antithrombotic Genes in Five Sympatrically Distributed Leech Species
Source: Research Square preprint supplement (doi:10.21203/rs.3.rs-7572984/v1), 2025-11-04
Supplement: Supplementary file 2 [file 63e7ef904d33cf3f5adc4827.xlsx]

## Sheet: Table S1
Table S1. TPM values of 79 genes in 12 Whitmania pigra samples
	TPM
Genes	Wpig 01	Wpig 02	Wpig 03	Wpig 04	Wpig 05	Wpig 06	Wpig 07	Wpig 08	Wpig 09	Wpig 10	Wpig 11	Wpig 12
antistasin_Wpig1	33728.3	43040.3	19672.8	33595.9	33180.2	19208.4	31930.3	17543.3	1449.04	14357.8	18721	2697.28
antistasin_Wpig2	1690.72	1076.5	1083.58	964.934	1277.52	1382.15	1111.33	2842.87	3634.67	4180.06	84.4901	150.096
apyrase_Wpig1	0	0.349008	0.550908	0.193324	0.120524	0.045019	0.246563	0.062593	0.594712	0.056345	0.140612	0.059758
apyrase_Wpig2	51.8044	41.7206	32.1628	14.5194	54.0378	77.0127	51.0364	36.5074	0.272467	86.6149	36.8904	60.8526
apyrase_Wpig3	3.32412	3.0828	6.0587	5.44722	3.78678	2.80532	2.71111	4.41811	7.01461	4.32305	4.175	19.8145
bdellastasin_Wpig	2080.32	737.254	2233.66	1605.86	561.549	1139.28	551.203	243.919	1279.14	814.995	2409.52	2885.87
bdellin_Wpig	847.72	298.269	404.382	834.266	320.495	482.275	338.283	359.962	222.625	449.925	1936.36	571.389
destabilase_Wpig1	0	0	0	0	0	0	0	0	0	0	0	0
destabilase_Wpig2	1298.17	110.265	1521.68	1223.72	207.856	196.227	82.4148	289.455	159.737	554.872	8609.61	516.799
destabilase_Wpig3	2637.07	4289.54	12629.1	2423.83	2544.47	11929.4	1081.18	5027.91	25802.1	13073	22.3899	2331.7
destabilase_Wpig4	79.9183	85.3235	13.0215	1.31031	4.40868	24.1523	38.336	20.092	2.4838	29.259	52.4846	104.432
eglin_Wpig1	147.835	174.258	173.469	189.413	331.193	86.6569	271.204	10.7967	203.945	117.68	358.706	138.643
eglin_Wpig2	136.315	9.45343	88.3959	75.1925	24.7091	31.7842	46.2834	13.7035	30.6153	57.3315	127.956	347.583
GGT_Wpig1	4.69703	3.26281	8.58751	5.60872	4.33497	2.74096	4.36695	2.04923	11.2269	2.85008	5.04513	11.1718
GGT_Wpig2	24.2031	33.0943	105.33	62.8976	169.668	107.059	87.938	37.3869	266.306	108.27	27.7873	55.248
guamerin_Wpig	2219.97	1156.86	3536.24	3327.48	688.719	1607.02	564.878	402.903	2371.83	947.862	2193.69	4894.68
hirudin_Wpig1	5032.79	1805.83	2148.56	4053.36	7721.92	7273.41	9054.75	4831.59	5.43156	6182.08	7044.23	31.5404
hirudin_Wpig2	5032.62	1805.75	2148.56	4053.29	7721.9	7273.19	9054.65	4831.27	0	6181.59	7043.9	31.4968
hirudin_Wpig3	5030.78	1804.12	1987.03	4053.14	7007.6	6180.06	9049.5	4830.61	0	6175.1	6942.19	31.4307
hirudin_Wpig4	5033.84	1805.62	2148.4	4053.25	7658.96	7273.28	9054.19	4831.24	0	6181.75	7043.24	31.3732
hirudin_Wpig5	7972.2	6847.2	3083.78	722.595	9047.22	9899.82	14696.3	8027.56	4.03807	7285.86	11589.8	51.1826
hirudin_Wpig6	6485.62	4099.87	4137.66	4732.4	9315.36	11985.4	10337.8	7182.65	2.07425	6620.65	5326.99	76.6544
hirudin_Wpig7	9.31098	10.6941	0	17.1643	2.19827	13.6694	0	1.61109	0	29.2612	0	0
hirustasin_like_Wpig1	381.19	169.614	679.608	693.031	66.0909	156.456	104.276	86.5531	174.587	140.851	861.842	416.114
hirustasin_like_Wpig2	120.609	120.339	571.344	479.469	22.3122	157.798	77.6467	20.6894	44.1768	90.2115	529.102	83.2097
hirustasin_like_Wpig3	55.4039	34.0323	229.298	323.992	7.70744	137.632	21.9333	16.6103	45.6875	91.2778	271.941	42.1786
hirustasin_like_Wpig4	156.365	136.81	703.632	469.292	52.8034	183.524	94.1119	11.9158	83.0161	150.162	752.917	104.981
hirustasin_like_Wpig5	1151.7	933.959	1799.99	1405.56	319.628	700.586	222.232	401.209	2304.36	853.566	977.92	1515.83
hirustasin_like_Wpig6	216.304	234.895	110.13	141.165	130.941	88.8831	31.7011	85.5537	124.694	220.06	836.746	108.383
hirustasin_like_Wpig7	7.42746	4.6828	6.73946	5.41535	17.8234	22.3336	0.367338	5.05722	17.1513	10.2364	12.4952	35.0252
hirustasin_like_Wpig8	0.584103	1.67641	3.1841	1.51921	4.34408	0.319403	2.88302	0.442044	0	0.803736	1.30722	0.416211
hirustasin_like_Wpig9	23.3705	27.1951	21.008	58.0114	31.9949	20.0644	42.8679	7.57215	5.71226	9.18963	13.8217	6.66452
hirustasin_Wpig	661.072	315.594	2042.3	965.991	508.858	845.893	155.558	82.0943	638.378	476.521	1410.01	1884.08
HMEI_Wpig01	100.087	22.411	157.43	16.0522	9.61159	20.2414	63.5414	26.6426	28.307	15.846	44.5606	4312.75
HMEI_Wpig02	531.935	751.933	1834.21	962.903	458.755	3008.48	405.229	1897.79	5222.69	1743.41	16.3539	432.228
HMEI_Wpig03	5.50366	6.11299	10.9149	46.7099	97.0487	36.7632	31.4163	1.19747	11.6744	8.67845	11.9166	2.54341
HMEI_Wpig04	175.053	180.39	537.859	418.906	402.2	1361.62	206.807	718.807	2534.12	409.254	13.7864	257.152
HMEI_Wpig05	0.681246	0	6.87144	1.09804	0.768814	0.489824	0.424581	0	0	2.82668	0.576638	0.809517
HMEI_Wpig06	534.883	267.476	867.124	419.169	338.757	533.341	184.043	158.019	771.342	332.836	324.404	1182.86
HMEI_Wpig07	16.3763	5.98967	15.4432	8.51018	4.18565	31.7451	50.7336	0.682636	3.53679	15.9869	7.51575	50.1262
HMEI_Wpig08	130.589	0.14379	272.284	4.30563	2.00595	116.337	4.09175	0.388618	0.990979	4.69991	16.8742	529.406
HMEI_Wpig09	72.2916	33.036	133.827	52.9795	41.3207	50.0142	28.3063	16.3642	87.0798	42.9452	48.625	136.726
HMEI_Wpig10	0	0	0.087273	0	0	0	0	0	0	0	0	0
HMEI_Wpig11	115.414	78.0407	62.2465	183.253	20.1012	84.7404	26.2549	17.871	90.0213	54.9534	149.812	188.556
HMEI_Wpig12	0.81929	0	0	0.032746	0.208866	0.551514	0.311992	0	0	0.060798	0	0.488399
HMEI_Wpig13	0	0.8535	1.38403	0.032746	0.208866	0.551514	0.311992	0.960849	1.08549	0.060798	0.071081	0.488399
HMEI_Wpig14	30.0384	10.6648	83.6942	67.3434	40.1819	37.454	4.82486	6.33138	27.1905	71.123	26.8381	21.3387
HMEI_Wpig15	49.4976	121.889	44.4548	36.5634	19.7743	170.024	10.2268	51.0195	259.441	18.9944	27.0529	66.4151
HMEI_Wpig16	33.4196	32.1069	50.3176	196.513	377.893	149.813	124.903	3.14896	48.9877	30.5599	59.3166	8.08902
HMEI_Wpig17	681.714	181.354	506.67	96.2475	118.348	229.597	225.571	77.2609	172.308	159.627	381.449	6852.52
HMEI_Wpig18	301.507	1.48757	219.333	0.753657	0.927959	2.57711	12.5612	1.10577	0.569698	1.17038	2.37802	3881.15
HMEI_Wpig19	201.558	15.225	0.249631	0.141877	0.169515	359.741	1.14511	10.514	0.118014	7.36442	63.7748	1.27042
HMEI_Wpig20	0	0	0	0	0	0	0	0	0	0	0	0
hyaluronidase_Wpig1	53.5891	34.246	19.5279	5.67467	12.7534	6.61774	56.8661	71.7999	0.280407	47.3988	12.9133	0.197071
hyaluronidase_Wpig2	6.23986	24.2649	19.2326	8.37078	6.44869	15.0105	19.1359	19.8729	17.6369	13.6317	18.0648	23.8208
hyaluronidase_Wpig3	16.9486	20.0569	17.4912	16.5077	14.7025	16.3318	20.2965	22.4847	22.7423	19.057	23.7372	31.467
LCI_Wpig	4774.52	4208.69	4360.62	3198.43	3941.7	5959.86	3654.39	7713.75	9254.54	10616.2	846.429	995.729
LDTI_Wpig	0	3.3002	11.3926	14.0532	543.128	262.938	47.0824	0.841191	43.1936	80.018	7.29055	5.31455
lefaxin_Wpig1	3447.44	2225.74	3275.79	3403.98	2870.74	2172.38	1859.09	2403.67	1598.26	2434.15	5749.48	4058.6
lefaxin_Wpig2	20824.7	11595.3	13323.8	24119.1	10492.9	13535.2	20257.8	16162.9	10864.3	11692.4	17337.2	13313.1
lefaxin_Wpig3	99.3992	88.7523	89.3637	95.8193	61.6922	93.5125	106.28	86.235	95.3596	84.8576	87.8527	84.878
lumbrokinase_Wpig1	0.11102	0.062334	0	0.057545	0	0	0.00918	0.021006	0.047104	0.113391	0.010469	0.040011
lumbrokinase_Wpig2	0	0.06249	0	0.057688	0	0	0.00918	0	0	0	0.010469	0.240069
lumbrokinase_Wpig3	0	0	0	0	0	0	0.00918	0.021006	0.047104	0	0.010469	0
lumbrokinase_Wpig4	0.310031	0.855614	1.60553	6.84556	48.5184	6.21837	27.4064	0.767998	2.48795	3.45447	2.48761	1.747
piguamerin_Wpig	32.1838	35.2884	172.631	56.4268	3.44841	29.9951	2.94681	0	71.2965	44.4293	9.39034	0
progranulin_Wpig	94.4353	59.9155	59.8025	82.2421	105.8	49.3931	65.2421	84.3687	79.2649	58.2931	180.778	129.117
saratin_Wpig01	0	0	0	1601.35	0	727.186	0	0	0	594.176	203.954	0
saratin_Wpig02	0	0	0	7354.95	0	5077.88	0	0	2.13965	752.853	1233.24	0
saratin_Wpig03	5295.67	6799.45	3801.37	1129.46	7737.22	2717.47	9411.12	7743.31	1.40372	3585.91	2849.66	107.241
saratin_Wpig04	15546.6	9542.45	5622.05	7354.5	22596.7	12994.4	22399.8	10824.6	2.13965	22392.2	16087.1	588.68
saratin_Wpig05	1506.13	1225.33	851.336	1980.76	2306.82	26997.7	5916.65	1275.27	2.81024	10274.5	3379.61	46.8096
saratin_Wpig06	1474.78	1224.94	851.152	0	2271.81	0	0	1260.14	0	7691.89	0	0
saratin_Wpig07	1460	1151.72	693.921	1979.89	2116.37	42.9989	5655.21	1150.12	0	0	3275.99	46.8001
saratin_Wpig08	1460.11	1151.65	694.487	2113.02	2116.31	0	5520.28	1150.09	0	0	3484.16	199.358
saratin_Wpig09	1429.96	1151.28	694.267	0	2096.32	0	0	1136.46	0	0	0	0
saratin_Wpig10	13992.2	9175.88	6473.1	5392.19	9728.04	13108.6	11049.1	9439.78	2.7016	15953.8	11373.1	278.524
saratin_Wpig11	79.3919	4068.05	2773.56	26.2613	7022.09	7859.03	7785.85	4129.29	2.38348	3406.65	4484.69	1.57245
therostasin_Wpig	5.82408	8.25792	12.8138	3.02062	6.21077	75.067	3.33575	19.2379	21.5973	30.2066	0	2.42151
Note: TPM, transcripts per million; Whitmania pigra 01-12,Wpig 01-12.
