# Supplementary material for: Comparative Study on the Expression Levels of Antithrombotic Genes in Five Sympatrically Distributed Leech Species
Source: Research Square preprint supplement (doi:10.21203/rs.3.rs-7572984/v1), 2025-11-04
Supplement: Supplementary file 3 [file 8da87b13e9b583ef78fc4768.xlsx]

## Sheet: Sheet1
Table S5. TPM values of 83 genes in 12 Hirudo tianjinensis samples
	TPM
Genes	Htia 01	Htia 02	Htia 03	Htia 04	Htia 05	Htia 06	Htia 07	Htia 08	Htia 09	Htia 10	Htia 11	Htia 12
antistasin_Htia1	4.31415	21.1492	802.234	136.318	3.86376	1.32828	125.134	630.599	4.63983	12.9876	300.062	325.538
antistasin_Htia2	182.511	535.372	550.571	395.033	138.412	779.89	198.209	561.579	624.947	114.22	283.182	116.344
apyrase_Htia1	3.75794	4.68334	4.79082	5.56853	6.72301	2.88676	4.52931	3.24785	5.83893	6.88321	5.10804	5.45017
apyrase_Htia2	0.591351	2.53994	25.1345	7.69683	0.083561	0.383837	5.29138	72.9266	0.225301	1.52808	22.9055	16.9277
apyrase_Htia3	3.56837	42.5158	38.7362	25.4514	7.741	3.89563	17.7961	49.803	5.65033	13.2858	17.446	39.022
apyrase_Htia4	0.327707	1.95607	57.529	4.48221	0.384305	0.189108	5.94891	71.1578	0.370109	0.591677	37.5708	15.3894
apyrase_Htia5	0.546179	5.26414	115.218	14.9512	1.15291	0.45386	13.1382	191.871	1.75185	5.99745	171.547	104.603
apyrase_Htia6	1.62013	14.1941	110.509	68.3839	13.1265	1.33846	46.5525	372.948	0.448967	3.04505	152.516	52.3614
apyrase_Htia7	10.9236	6.99008	0.063921	0.156721	1.67447	2.11802	0	0	5.03349	5.91676	0.963438	0.281341
bdellastasin_Htia	4457.09	5262.37	5142.28	4284.44	4377.22	5900.6	4233.54	5268.62	3273.3	3329.72	7542.84	3523.59
bdellin_Htia	1042.16	1496.53	1079.21	2765.34	1856.64	784.09	4373.08	1018.56	881.355	4152.41	3330.7	3457.76
decorsin_Htia1	2.08527	18.623	613.522	335.06	8.58624	0	248.049	1440.15	10.44	14.3932	340.601	317.255
decorsin_Htia2	0	464.156	661.253	2426.21	55.5158	1.09092	220.121	10911.4	2.08945	6.05696	4334.39	1983.07
decorsin_Htia3	0	3.28421	961.869	7.93215	0	1.09092	4.29518	73.5715	0	1.51483	59.7969	10.522
decorsin_Htia4	32.0175	74.8845	1449.08	789.589	11.3249	1.66799	623.875	2771.79	20.7539	48.8753	2205.04	2050.48
decorsin_Htia5	3.2755	3.04869	290.18	108.513	2.19804	0.833995	71.3577	372.293	3.72928	5.38028	231.462	257.524
destabilase_Htia1	761.2	1076.45	230.025	851.26	164.894	1234.93	836.25	452.07	1290.34	239.759	791.788	211.545
destabilase_Htia2	143.154	274.635	308.541	333.587	129.395	58.2598	918.325	47.2637	43.7546	491.339	1253.14	305.175
destabilase_Htia3	1.57891	10.041	6.72967	2.72609	0.376512	0	244.021	0	2.20426	186.639	3.61742	5425.16
destabilase_Htia4	0.817007	0.831011	0.139975	0.205668	0.959778	10.5492	0.110521	9.8858	0.26701	47.2705	28.3614	2.99134
eglin_Htia1	30.4971	101.715	23.9258	48.4585	3.31973	18.2537	150.617	0	54.4388	68.6935	11.8659	30.0751
eglin_Htia2	11.7297	9.77334	13.1206	32.1795	21.9102	6.24468	8.5543	0.863256	16.0114	20.482	56.5914	1.63452
eglin_Htia3	878.988	1440.05	1157.15	1135.71	2364.28	2452.38	923.025	1217.69	1419.88	1667.96	1996.16	1442.54
eglin_Htia4	266.965	294.633	232.867	319.445	782.911	278.552	427.442	140.917	166.14	207.653	632.606	191.075
eglin_Htia5	1221.14	1246.6	334.807	832.129	165.561	617.662	688.656	226.264	998.978	301.055	505.218	155.914
eglin_Htia6	1237.37	619.538	270.387	1427.95	579.301	499.741	999.95	819.188	478.492	598.296	851.417	326.337
GGT_Htia1	26.5548	34.4237	16.9775	14.4272	18.7025	21.6137	82.4352	43.7287	16.2438	105.834	56.4383	150.987
GGT_Htia2	1.4767	1.9013	1.46393	0.708437	3.86354	3.28972	4.33582	9.31277	2.1014	17.3746	4.01545	20.0103
guamerin_Htia1	274.179	332.635	136.088	209.808	379.016	207.495	243.872	213.729	515.313	118.987	199.268	136.218
guamerin_Htia2	558.836	469.595	236.404	64.4003	241.485	566.212	422.969	204.513	107.457	128.292	266.44	143.807
guamerin_Htia3	6392.16	6698.17	5023.21	5461.83	7677.45	8982.94	7087.74	3976.34	6081.57	7098.25	9916.15	6156.07
guamerin_Htia4	2465.68	3875.17	1567.87	470.971	4394.02	1098.31	3585.2	3225.07	326.157	4025.96	4114.99	3690.77
guamerin_Htia5	1071.25	1652.46	1609.05	1864.18	945.866	1702.95	1050.75	946.581	1310.58	1342.01	2085.23	1242.99
guamerin_Htia6	458.704	305.714	43.671	320.009	1111.82	213.209	357.104	404.322	590.33	432.875	731.255	208.611
guamerin_Htia7	161.204	229.323	202.419	160.508	214.416	166.647	526.208	123.922	104.258	82.3047	15.1479	473.036
hirudin_Htia1	47.6956	131.649	4947.49	2449.45	54.7934	45.663	1103.56	11080	23.8753	177.833	4440.28	3846.87
hirudin_Htia2	120.266	832.87	20314.1	5953.16	312.78	117.483	4041.86	17006.7	121.113	518.707	11880.9	7188.55
hirudin_Htia3	1.60423	32.6816	729.96	114.68	3.52772	3.33598	106.501	99.357	11.4602	31.6491	327.824	540.43
hirustasin_Htia	48.737	21.4089	34.7423	365.026	876.312	368.142	570.379	394.899	380.904	642.56	724.342	61.7703
hirustasin_like_Htia1	1239.07	887.027	686.854	921	2191.67	1234.17	269.314	683.247	1523.74	686.899	989.107	798.291
hirustasin_like_Htia2	6.752	69.7528	469.931	453.702	37.7161	3.11351	209.209	1637.17	0.966619	15.7422	4.52152	569.996
HMEI_Htia01	0.116347	33.5945	195.453	0.096324	0.168499	0.118443	74.2132	0.450463	0	0.081426	0.315707	0.085309
HMEI_Htia02	0	19.4644	17.4329	0	0	0	10.4449	1.6517	0	0	0	0
HMEI_Htia03	0	102.225	212.074	0	0	0	193.279	1.8987	0.038051	0	0	0.174279
HMEI_Htia04	2.6466	1694.54	1650.22	0.381204	0.916923	3.28061	1826.32	72.3647	0	0.241751	1.24969	1.18189
HMEI_Htia05	0	2598.77	1623.51	13.8617	0.164963	0	1791.97	55.5151	0.218921	0.079756	0.077299	1.33679
HMEI_Htia06	0.35964	4.83627	13.4479	0.495787	0.943018	0.243966	12.39	0.617902	0.229942	0	2.91482	0.526596
HMEI_Htia07	0	84.0824	258.832	116.711	3.32402	0.111111	169.758	260.236	0.560611	0.153199	79.7121	47.8926
HMEI_Htia08	18.9865	38.96	848.401	92.156	1.50042	6.67839	70.4317	7.87542	5.82494	14.9886	5.8579	976.832
HMEI_Htia09	4.21124	8.59405	5.004	5.84642	12.4547	3.01352	7.0532	1.10295	1.60542	3.19026	3.55573	3.09132
HMEI_Htia10	4.48772	520.452	588.941	0.667107	2.5007	0.234329	235.973	2.37749	0.2212	0.241751	1.01537	1.77284
HMEI_Htia11	10.8166	12.0015	83.0507	0	0.583496	0	3.2955	5.79512	1.91707	0	0	0.253262
HMEI_Htia12	0.230139	2302.13	2399.14	4.57444	0.083357	0	1592.57	179.649	0.368667	0.161167	0	2.78588
HMEI_Htia13	1630.58	507.699	117.337	1552.37	714.165	146.931	3589.22	660.95	48.834	334.482	956.773	1812.23
HMEI_Htia14	479.132	180.434	0	361.271	294.335	50.7854	935.867	131.41	167.869	195.754	338.417	362.682
HMEI_Htia15	18.2243	2149	2185.89	2.95091	17.9762	49.2227	2484.69	40.9611	114.931	112.001	51.801	6.93172
HMEI_Htia16	3.07844	435.872	677.373	0.407022	0	5.00995	50.2857	6.10059	7.70402	26.1106	9.49407	0.810201
HMEI_Htia17	109.085	30.956	0	156.684	29.4018	4.38249	307.209	49.8674	1.49681	8.53731	52.4988	45.0327
HMEI_Htia18	0.120336	2.43356	5.27993	0	0.870392	1.83659	1.83974	8.60423	3.69229	7.14426	2.44457	1.84973
HMEI_Htia19	7.5946	29.4663	218.811	0.381204	2.75077	0	3.83197	8.98986	0.073733	0.564085	1.4059	3.54567
HMEI_Htia20	0.127547	16.1564	68.8409	0.105279	0.184148	0	5.41293	2.70337	0.487675	0	0.172209	54.82
HMEI_Htia21	0	0	0	0.554089	0	0	0.074291	0.072038	0	0	0	0
HMEI_Htia22	0	297.325	613.453	0	0	0	988.03	0	0	0	0	0.689719
HMEI_Htia23	0	34.0626	0.53279	0	0.430449	0	117.93	2.60738	0	0	0	0
HMEI_Htia24	0	0.291557	0.312164	0	0	0	0.248326	0	0	0	0	0
hyaluronidase_Htia1	1.86176	4.25451	10.2199	4.58624	1.81719	0.082724	13.3304	85.3663	0.147336	2.17347	21.5322	28.3303
hyaluronidase_Htia2	86.9034	27.8257	70.136	51.9109	52.7566	92.1171	18.528	16.7522	42.8526	16.1786	22.5638	13.222
hyaluronidase_Htia3	35.5739	35.1826	29.1821	32.0981	36.6568	32.4173	26.9479	19.5563	35.1984	33.2228	31.9936	24.0784
hyaluronidase_Htia4	0.046927	4.24698	12.9768	4.96711	0.214002	0.227977	7.60898	95.6937	0.1286	0.087536	28.4407	6.13527
LCI_Htia	616.162	707.466	303.781	513.093	708.881	580.048	627.236	378.585	324.949	580.951	656.262	1058.85
LDTI_Htia	2387.67	1050.52	1200.41	3333.88	719.647	1501.21	2314.49	175.525	769.649	1116.63	573.193	203.012
lefaxin_Htia1	3063.75	3529.28	2802.4	2463.65	2093.35	3037.32	3022.35	1991.44	1754.85	2146.46	3093.88	1641.55
lefaxin_Htia2	5522.35	4546.95	4311.26	3333.66	2984.98	4701.5	6209.94	1236.61	3630.85	3930.18	5539.09	3390.25
lefaxin_Htia3	159.382	154.336	134.767	161.983	180.699	240.717	148.331	107.838	200.812	159.174	138.033	98.0596
lumbrokinase_Htia1	0.051451	0.03989	0	0	0	0	0	0	0.174704	0.037009	0	0
lumbrokinase_Htia2	0.302366	0.635006	0.61447	0.51631	0.640361	0.521196	0.520933	0.406343	0.776388	0.736533	0.67736	0.539075
lumbrokinase_Htia3	1.86761	0.653772	0.045165	0.132818	0.116277	0.536525	0	0.034836	0.133676	0.037884	0.146697	0
piguamerin_Htia1	4125.74	2730.02	2164.55	935.287	2299.52	2860.03	4193.32	3942.18	1339.39	2629.25	6480.51	1880.79
piguamerin_Htia2	107.053	31.8893	50.0194	56.0295	27.4523	101.913	389.333	90.4278	104.407	198.433	80.3086	311.533
progranulin_Htia	0.063105	0.293707	0.024184	0.260403	0.022764	0.257363	0.399837	0.304119	1.87509	2.0056	0	1.65775
saratin_Htia1	0.104423	1275.95	3546.62	2662.5	44.5028	2.96701	1020.98	8830.74	2.60678	0.141749	2654.67	971.107
saratin_Htia2	0.104423	1275.95	3546.62	2662.48	44.5022	2.96701	1020.98	8830.95	2.6059	0.141749	2654.67	971.102
therostasin_Htia	2.08882	15.6004	3.43381	1.44281	0.42088	0.607031	77.0897	0	1.29033	47.0244	6.78792	723.651
Note: TPM, transcripts per million; Hirudo tianjinensis 01-12,Wacr 01-12.
