# Supplementary material for: Comparative Study on the Expression Levels of Antithrombotic Genes in Five Sympatrically Distributed Leech Species
Source: Research Square preprint supplement (doi:10.21203/rs.3.rs-7572984/v1), 2025-11-04
Supplement: Supplementary file 4 [file ac5c39889e14bc0da99da562.xlsx]

## Sheet: Table S2
Table S2. TPM values of 76 genes in 12 Whitmania laevis samples
	TPM
Genes	Wlae 01	Wlae 02	Wlae 03	Wlae 04	Wlae 05	Wlae 06	Wlae 07	Wlae 08	Wlae 09	Wlae 10	Wlae 11	Wlae 12
antistasin_Wlae1	410.249	2769.33	650.912	413.829	116.851	561.85	267.967	722.326	165.537	395.628	0.136351	154.382
antistasin_Wlae2	1817.89	3820.73	1370.1	1375.81	436.694	3165.83	343.978	2624.71	255.45	1963.05	6.23572	283.6
antistasin_Wlae3	1817.79	3820.68	1370.05	1375.75	436.687	3165.75	343.964	2624.61	255.432	1963.05	0	283.597
apyrase_Wlae1	0.035993	0	0	0	0	0	0.027797	0	0	0.039439	0.080336	0
apyrase_Wlae2	57.1455	69.0743	140.532	160.476	243.306	131.838	154.357	117.511	73.3855	95.5902	191.746	142.879
apyrase_Wlae3	0.555975	0.464693	0.577714	4.86534	3.31641	0.074807	0.027173	0.141008	0.101146	0.477231	1.98739	0.132213
apyrase_Wlae4	11.9114	9.42363	7.1675	9.77314	9.48149	7.96665	8.10388	8.19956	7.96367	9.16743	9.41667	18.0071
bdellastasin_Wlae	1608.44	2737.59	1789.64	1371.62	975.747	1908.66	2968.02	1000.67	1917.84	932.098	686.255	1599.13
bdellin_Wlae1	1248.92	1090.14	1631.52	998.13	1722.64	1274.13	3589.04	1396.63	4222.16	2431.18	1593.48	1243.55
bdellin_Wlae2	35.4903	34.1478	26.8844	6.55115	33.7005	27.4154	59.4504	28.2376	42.2934	149.742	85.1794	36.2263
destabilase_Wlae1	1232.26	4443.63	1336.19	3566.82	2352.74	3890.4	3484.04	1260.92	5461.88	2862.07	657.183	1863.46
destabilase_Wlae2	843.585	210.451	984.188	343.305	1590.16	264.018	735.467	285.92	6690.79	1233	300.881	208.321
destabilase_Wlae3	0	0	0	0.164517	0.166065	32.173	0	0	2.02314	0.396297	0	0
destabilase_Wlae4	2.65336	184.102	6.03446	0.658978	20.9752	7.67072	3.59921	5.57991	59.2903	21.6852	16.8331	0.342575
destabilase_Wlae5	194.343	529.336	402.125	533.047	671.052	594.462	380.537	414.588	1026.08	560.381	250.278	278.029
destabilase_Wlae6	1.36379	47.1669	30.0168	10.034	18.6052	4.60499	4.2126	30.3726	58.9036	18.6988	36.4346	4.26696
eglin_Wlae1	423.781	371.544	555.055	402.144	1033.38	392.23	565.776	441.341	200.147	768.589	478.673	588.795
eglin_Wlae2	0	0	0	0	0	0	0.983635	34.6325	97.54	74.1567	0.472184	0
eglin_Wlae3	354.105	350.8	431.796	302.747	352.342	304.042	233.633	220.67	371.568	454.901	354.935	589.243
eglin_Wlae4	1.62801	1.2659	0	1.882	1.05413	0.58251	2.14464	1.64427	4.2777	0	5088.46	0.509677
eglin_Wlae5	91.6361	89.8793	88.664	24.949	19.1968	38.1156	114.007	21.3024	15.5017	56.4144	129.292	45.095
GGT_Wlae1	96.5802	32.1516	42.2456	58.2728	91.7105	85.0684	73.7865	127.283	69.53	81.3774	85.9539	37.7812
GGT_Wlae2	23.813	14.1324	16.1603	6.63919	16.9271	14.6951	20.6065	15.5091	13.3165	14.8219	9.54945	30.022
guamerin_Wlae	1190.1	1258.84	1737.13	961.766	1436.88	781.866	2460.74	1171.06	1840.76	1482.14	974.902	1163.17
hirustasin_like_Wlae1	907.755	1024.22	890.966	964.856	1189.04	335.153	1366.01	333.555	1170.6	700.98	739.613	696.384
hirustasin_like_Wlae2	600.833	466.745	923.022	250.978	1267.5	291.737	1997.77	636.424	504.842	527.33	1430.23	847.987
hirustasin_like_Wlae3	1010.3	2294.46	2907.78	683.381	1872.04	557.326	3339.06	1942.19	1947.31	778.49	1436.74	1742.65
hirustasin_like_Wlae4	40.2624	117.378	55.0601	97.9952	55.4791	62.5506	69.7389	88.083	107.145	38.0544	23.6864	22.59
hirustasin_like_Wlae5	371.473	321.59	298.353	66.2683	126.56	104.216	555.206	150.167	445.753	51.8595	239.767	250.655
hirustasin_like_Wlae6	18.7798	1.04616	21.1884	6.98951	1.30349	30.1819	0.529477	12.206	8.57865	64.5205	440.729	17.0311
hirustasin_like_Wlae7	718.116	5.43928	26.5257	88.9798	106.31	50.0117	6.05158	52.8893	76.1648	71.6821	348.675	99.0032
hirustasin_like_Wlae8	0.755112	0	0.611009	0	0	0	0	0	0	0	0	0
hirustasin_Wlae1	826.234	894.684	983.71	460.709	714.596	394.024	1014.81	847.701	1201	835.359	411.489	666.045
hirustasin_Wlae2	440.738	361.873	843.797	314.747	272.465	91.5395	959.502	444.35	2489.07	450.588	367.883	380.464
HMEI_Wlae01	225.894	242.956	238.695	290.062	409.927	235.823	464.207	143.105	317.372	274.003	245.759	171.662
HMEI_Wlae02	786.676	408.198	526.753	593.611	825.083	395.567	551.627	338.394	859.915	550.21	327.306	329.48
HMEI_Wlae03	92.4532	138.996	131.871	77.8946	260.425	166.36	174.492	112.401	532.068	238.137	168.86	102.772
HMEI_Wlae04	109.387	76.0654	82.3286	68.2611	247.961	159.914	143.032	136.818	258.339	224.526	76.0761	61.8353
HMEI_Wlae05	47.5423	76.9505	208.46	18.0003	66.6932	33.99	116.588	77.0863	137.397	91.353	31.6207	213.519
HMEI_Wlae06	4.14611	3.743	0	0	10.144	0	0	0	0	0	0	0
HMEI_Wlae07	0.32672	1.26455	7.76226	0.093588	1.87651	2.3905	6.8602	2.18233	0	28.0914	0.648339	1.52293
HMEI_Wlae08	0.323176	24.0191	2.84665	0.462829	0	20.0407	0.083765	0.863476	0	0.706477	1927.83	0
HMEI_Wlae09	0.3752	1.25756	1.60547	1.39998	1.91644	1.04742	2.24094	3.00854	1.44425	0.820619	1.11842	4.19948
HMEI_Wlae10	35.2932	34.727	153.809	127.752	108.316	22.9309	223.197	133.205	49.9686	48.3511	21.2864	164.178
HMEI_Wlae11	0.7504	0.290207	0	0.430763	0	0	0	0.250712	0	0	748.223	0
HMEI_Wlae12	115.85	59.7095	19.5784	85.1642	108.609	30.5768	28.8662	17.3755	111.518	60.5162	4.27821	13.3406
HMEI_Wlae13	71.3694	57.7468	67.2546	144.157	156.78	199.906	41.6206	69.017	160.964	205.509	43.4416	30.3942
HMEI_Wlae14	467.416	530.279	655.728	226.453	517.375	505.81	928.369	581.193	552.282	802.14	365.821	467.035
HMEI_Wlae15	50.5693	9.13084	9.2449	40.7164	13.0012	17.3492	1.48047	11.6518	2.7533	8.33206	3.90053	1.48538
HMEI_Wlae16	204.872	276.142	378.901	349.107	320.158	307.504	379.108	365.564	213.881	326.433	289.835	201.329
HMEI_Wlae17	2853.43	1111.84	683.592	802.582	678.639	2023.75	305.978	1621.36	226.032	1550.85	193.073	398.731
HMEI_Wlae18	2208.81	1422.24	252.66	2484.07	1517.35	1030.01	535.007	233.76	1198.5	350.959	10.261	220.162
HMEI_Wlae19	3.11774	0.180281	263.255	1.7694	64.6409	105.72	296.074	33.7406	862.326	171.607	1.38787	61.4501
HMEI_Wlae20	24.9961	11.5888	32.2009	120.115	16.1679	38.614	20.7584	6.88226	56.5988	25.9666	26.5663	14.9053
HMEI_Wlae21	40.4919	17.1347	15.8617	3.97456	11.3487	3.61337	28.6594	38.3695	23.3003	16.9692	23.068	21.8625
hyaluronidase_Wlae1	1.44246	0.373745	0.681489	0.135619	1.37803	0.791666	0.992313	0.744594	4.37521	0.913889	1.98314	0.442813
hyaluronidase_Wlae2	19.1358	16.2509	13.2512	25.7327	17.1241	13.2888	12.226	16.6481	28.1095	13.4743	18.1404	22.408
hyaluronidase_Wlae3	22.758	20.481	20.5105	21.1597	23.8152	20.3433	18.8256	17.3842	20.158	23.003	15.6689	16.435
LCI_Wlae	3137.12	3260.99	1766.45	1156.63	527.225	3728.63	443.808	2125.04	522.256	1929.61	331.064	353.754
LDTI_Wlae	1576.77	2876.73	3337.04	1745.61	4450.89	3013.55	3489.22	2980.91	2543.67	7126.97	2649.48	1953.34
lefaxin_Wlae1	1413.84	1465.06	1829.63	1667.9	2028.71	1409.05	1950.33	844.819	2504.45	1903.09	758.998	2138.59
lefaxin_Wlae2	14070.4	11606	13900.3	15018.1	13209.8	17522	17320.2	11236.5	12814.2	14008.7	3468.45	15280.6
lefaxin_Wlae3	105.436	94.7388	93.538	112.214	129.598	103.454	120.182	101.492	127.226	107.714	114.581	109.415
lumbrokinase_Wlae1	0	0.0757	0.192394	0	0.046389	0.049974	0	0	0.092157	0.05289	0.674447	0.180172
lumbrokinase_Wlae2	0.048301	0.037849	0	0.461334	0.046042	0	0.122259	0	0	0.052885	0.470911	0.090231
lumbrokinase_Wlae3	0.096601	0	0	0.202084	0.046043	0.050223	0.288475	0.048359	0.185102	0.370229	0.076031	0
lumbrokinase_Wlae4	13.2428	6.53301	59.1247	13.011	24.1878	15.0093	45.7104	41.6435	26.4218	49.6769	24.2599	34.5992
piguamerin_Wlae	1936.6	700.441	447.78	154.342	1125.46	335.3	993.108	2281.08	2583.31	1677.1	1523.97	885.902
progranulin_Wlae	103.914	64.8301	73.4787	96.5565	158.654	52.8892	92.3065	64.571	84.3993	71.0682	80.0294	67.7891
saratin_Wlae1	3493.32	5822.38	14482.2	8122.62	7549.74	9290.16	11797.1	8042.85	3460.99	6693.67	9295.13	10745.7
saratin_Wlae2	5.56754	11.7274	0.269025	4.71459	2.97381	2.99607	6.73969	7.70352	0.331268	2.25875	7.38163	5.77458
saratin_Wlae3	749.542	2202.45	7.75398	784.035	7.02353	9.71077	39.6895	789.986	2.50118	7.60181	595.393	78.6467
saratin_Wlae4	5.55162	61.4472	2662.22	895.634	1323.44	1898.5	1236.75	972.531	636.199	1146.05	1587.99	1126.49
saratin_Wlae5	19415.1	54288.5	49634.5	43803.9	24518.2	49284	36422.9	41457.5	10103.6	21484.3	61745.7	53412.1
saratin_Wlae6	5552.94	8818.05	10560.5	7244.85	4751.25	6790.21	13812.2	6644.77	1736.74	4859.36	4826.96	8836.12
therostasin_Wlae	10.458	3.8075	0	2.42122	0.677132	2.23933	0	3.52595	0	6.86488	0	0.65565
Note: TPM, transcripts per million; Whitmania laevis 01-12,Wlae 01-12.
