# Supplementary material for: Comparative Study on the Expression Levels of Antithrombotic Genes in Five Sympatrically Distributed Leech Species
Source: Research Square preprint supplement (doi:10.21203/rs.3.rs-7572984/v1), 2025-11-04
Supplement: Supplementary file 5 [file d99bc50fd64301e7d5f2ad07.xlsx]

## Sheet: Sheet1
Table S3. TPM values of 102 genes in 12 Whitmania acranulata samples
	TPM
Genes	Wacr 01	Wacr 02	Wacr 03	Wacr 04	Wacr 05	Wacr 06	Wacr 07	Wacr 08	Wacr 09	Wacr 10	Wacr 11	Wacr 12
antistasin_Wacr1	1131.52	895.927	1758.15	1666.04	189.243	1004	552.871	170.982	875.78	2174.28	1652.54	1535.35
antistasin_Wacr2	0	0	0.431608	0.401397	2.86536	0	0	0.153648	0	0	0.199123	0.459039
antistasin_Wacr3	1309.41	1408.76	1.98222	401.1	422.716	532.177	511.659	53.2286	1155.4	800.773	0.979818	1378.99
apyrase_wacr1	0	0.030226	0	0.286776	0.121034	0	0.016716	0	0	0	0	0
apyrase_wacr2	0	0	0.05761	0	0.106298	5.48852	2.52724	4.96121	14.3243	1.57652	0.078992	0
apyrase_wacr3	0	0	5.40246	6.84632	2.48662	0	0.016716	0.471276	0.034465	0	0	15.7229
apyrase_wacr4	0	0.063501	0.028805	0	0.053149	1.87486	1.36896	14.7098	4.00028	1.74285	0	0.030584
apyrase_wacr5	0	0	0	0	0.025597	0.228643	0.135214	0.268041	0.243976	0.164695	0	0
apyrase_wacr6	0	0	0	0	0	0	0	0	0.145011	0	0	0
apyrase_wacr7	0	0	0	0	0	0.058029	0.034311	0.241846	0.069037	0	0	0
apyrase_wacr8	0	0	0	0	0	0.058029	0.034311	0	0.069037	0	0	0
apyrase_wacr9	14.6776	9.96419	11.2863	8.2505	12.3631	9.94596	10.4791	17.929	15.4402	9.68405	8.21217	9.98102
bdellastasin_Wacr	366.812	244.045	96.1379	161.034	224.696	305.251	128.264	145.624	139.065	89.6786	251.319	227.587
bdellin_Wacr1	572.587	549.093	342.441	1199.55	3370.89	2638.89	237.617	1864.7	2962.76	1492.38	1899.22	892.403
bdellin_Wacr2	48.2275	44.6904	15.7944	30.1874	99.677	84.0397	21.808	228.14	123.234	138.929	64.1515	27.0567
bdellin_Wacr3	271.021	293.179	221.196	328.161	1340.51	1215.92	344.137	3922.85	1309.89	810.515	182.049	369.673
destabilase_Wacr1	9.47656	3.46581	3.62432	2.09919	16.8477	5.68558	0.568157	53.847	23.7817	8.82005	0.399619	4.60818
destabilase_Wacr2	170.269	135.006	325.875	169.542	141.702	132.5	181.196	414.984	153.605	158.897	28.7303	37.8536
destabilase_Wacr3	126.774	71.0224	46.146	83.7834	226.887	112.208	135.196	462.857	195.155	189.254	152.386	93.3426
destabilase_Wacr4	34.7065	39.0676	77.8993	64.5128	261.399	136.284	96.7056	998.404	295.997	273.499	59.8922	145.609
destabilase_Wacr5	4998.81	1101.24	124.838	543.081	1963.55	1079.08	890.077	4607.72	3061.38	4758.65	735.773	2477.75
destabilase_Wacr6	17856.7	20468.8	21541.8	14528.6	1808.78	8561.61	4373.97	18.0552	4403.28	16420	15683.3	9968.97
eglin_Wacr01	320.148	118.108	103.403	157.442	152.057	465.002	305.565	813.357	189.363	968.445	32.9244	264.192
eglin_Wacr02	187.624	28.9254	30.3225	71.2489	230.592	196.095	52.5246	109.814	37.9418	39.3889	181.546	110.19
eglin_Wacr03	2017.53	963.135	944.98	1008.81	1379.03	1236.86	510.719	2902.9	1345.43	1796.49	1004.71	1814.71
eglin_Wacr04	246.756	40.4663	29.2154	148.35	139.306	108.713	195.964	194.178	41.9461	237.816	48.877	58.5541
eglin_Wacr05	737.075	674.58	960.519	987.394	1209.11	813.004	607.606	1763.97	871.033	635.458	210.01	694.742
eglin_Wacr06	1132.18	356.347	621.605	901.957	812.101	465.551	1001.6	946.313	324.125	2259.5	399.566	731.61
eglin_Wacr07	10.1833	5.26067	2.91177	3.99081	1.29455	1.48358	1.30108	4.60366	1.81939	4.25056	2.50012	1.15024
eglin_Wacr08	106.197	747.016	35.3052	25.2752	18.7709	21.1411	13.8782	32.9929	9.5518	41.6555	16.0008	336.636
eglin_Wacr09	2559.94	313.484	1325.82	1850.5	2801.64	1336.76	2435.17	4188.87	344.174	3880.01	683.544	670.965
eglin_Wacr10	588.888	209.343	403.477	426.731	705.807	378.104	360.79	678.367	491.461	380.951	346.985	398.77
eglin_Wacr11	149.994	88.9199	152.432	18.5234	194.207	288.688	92.1785	493.323	395.862	156.528	78.3859	35.9858
GGT_Wacr1	29.1971	28.7723	11.6268	31.5795	24.4408	14.9465	19.7952	50.1525	24.8705	10.9248	5.2858	20.2915
GGT_Wacr2	0.467083	0.647534	0.158035	0.90702	1.98383	8.23559	65.266	31.4938	24.9872	27.7747	0.019689	0.19132
GGT_Wacr3	1.64262	2.309	1.05736	1.29766	1.98977	1.5711	7.8262	5.93649	4.33435	3.86842	0.216219	1.02476
GGT_Wacr4	60.8153	55.9118	67.0652	81.9988	46.5113	44.4061	27.1253	4.73979	21.1017	24.2728	60.2645	56.39
guamerin_Wacr	3757.16	3240.99	1402.91	3432.32	7772.43	4872.26	1097.31	2012.89	4985.57	2190.53	4387.27	1271.97
hirustasin_like_Wacr1	0	0	1.3528	0	0	0	0	8.56297	2.53552	7.13777	2.79274	0
hirustasin_like_Wacr2	57.2972	41.7471	37.0861	50.8456	81.661	53.9445	24.0609	28.9945	32.3567	45.9074	31.3325	25.6065
hirustasin_like_Wacr3	710.466	934.688	77.5191	420.979	339.526	675.666	250.698	51.9574	1157.29	301.94	306.568	662.391
hirustasin_like_Wacr4	348.314	461.065	116.094	328.34	201.485	490.902	14.911	51.7216	605.956	84.3451	383.248	378.612
hirustasin_like_Wacr5	480.234	434.634	242.391	750.733	1164.94	796.325	36.5266	318.791	764.43	229.155	988.674	278.252
hirustasin_like_Wacr6	1321.56	1316.06	0.529801	512.329	421.269	649.277	487.337	21.1883	1472.72	733.201	3.64331	1101.62
hirustasin_like_Wacr7	193.995	456.83	39.3501	28.9163	169.306	9.90881	2.05549	35.898	20.6908	12.0688	0	764.273
hirustasin_like_Wacr8	221.793	485.562	132.205	113.594	190.153	10.3901	0.609817	35.7011	24.8124	16.1265	2.10424	841.454
hirustasin_Wacr	177.609	192.206	210.703	254.845	214.472	215.577	129.533	34.6822	283.318	153.627	275.943	186.209
HMEI_Wacr01	28.7576	137.491	389.553	1009.64	446.862	0	0	28.5079	0.426813	0.79894	19.8973	100.809
HMEI_Wacr02	30.5095	93.4066	559.293	2111.44	857.907	0	0.102082	38.8782	0.323621	0.100951	48.4181	81.5266
HMEI_Wacr03	0	0	0	0	0	0	0	0	0	0	0	0.091172
HMEI_Wacr04	70.7264	293.523	1076.49	3271.96	1122.63	1.24412	0.103198	84.1041	1.30879	1.73499	63.2634	228.477
HMEI_Wacr05	12.7623	2.28638	1.31238	0.594959	0.460586	0.495902	0.27919	0	0.539278	0.706656	1.28647	0.811644
HMEI_Wacr06	13.5475	47.6392	137.367	547.91	172.319	0.87897	2.24581	6.52501	2.15747	6.05705	15.5546	10.3712
HMEI_Wacr07	0.234555	0.33425	0.296731	0.510177	0.15374	0.295171	0.129139	0	0.215838	0.908558	0.58476	0.090199
HMEI_Wacr08	20.4277	84.7611	281.706	199.929	276.408	0	0	7.62579	0	0.901063	6.03779	12.4505
HMEI_Wacr09	511.4	175.891	13.9418	59.4656	408.644	335.995	51.469	79.1017	361.765	399.821	199.975	54.943
HMEI_Wacr10	511.321	175.894	13.7511	59.4613	408.621	336.164	51.4467	79.1087	361.732	399.901	199.976	54.9346
HMEI_Wacr11	9.94261	33.1594	190.127	292.206	81.3764	0	0	5.57543	0	0.85007	7.55336	10.7448
HMEI_Wacr12	1.66653	3.29233	360.7	646.026	42.184	0	0	1.37352	0.109066	0.495078	0	24.5855
HMEI_Wacr13	0	0	0	0	0	2.06673	1.04333	3.70519	1.87475	5.57193	0	0
HMEI_Wacr14	47.8734	245.791	1156.31	2246.24	822.634	0.179716	0	76.6975	0.771956	1.9605	32.644	190.63
HMEI_Wacr15	10.8445	79.1055	472.303	1703.12	62.2181	0.177731	0	11.536	0.218132	1.73405	15.1434	66.9134
HMEI_Wacr16	0	2.28066	211.922	1199.66	27.785	0	0.112984	0	0	0.781973	0	52.5329
HMEI_Wacr17	1339.14	1016.85	376.053	572.981	1477.66	1528.39	402.967	496.001	1816.11	852.23	1055.32	429.912
HMEI_Wacr18	7.57827	24.2423	120.239	295.22	112.229	0	0.107889	6.51428	0.11407	0.213377	6.30892	14.8739
HMEI_Wacr19	0	0.391601	4.08631	5.48885	3.08521	0	0	0.362392	0	0	0.874902	0.373787
HMEI_Wacr20	0.576576	0	0	5.47273	0	0	0	0	0	0	0	0
HMEI_Wacr21	336.951	1365.72	5748.95	16747	4324.16	0	0	214.856	0.478021	12.6233	294.807	683.752
HMEI_Wacr22	0	0	0	0	0	0	0	0	0	0	0	0
HMEI_Wacr23	61.6577	249.087	934.386	3252.07	1139.92	2.75699	1.60012	73.5053	2.81952	4.53649	82.6743	160.921
HMEI_Wacr24	0.828378	3132.9	3203.69	2566.83	1002.12	156.589	74.4732	395.866	241.269	155.871	120.632	1709.13
HMEI_Wacr25	0.771292	0.637291	0.178359	0.23794	0.92046	1.16407	0.60323	0	0.921491	0.806903	0.399796	0.121405
HMEI_Wacr26	317.891	99.6505	18.8528	215.701	616.389	345.413	57.9441	150.199	427.766	253.741	48.9332	29.4299
HMEI_Wacr27	464.229	3.50438	1.20259	341.986	685.303	435.542	3.27284	178.316	648.548	332.556	1.38739	0.577868
HMEI_Wacr28	0	0	0	0	0	0	0	0	0	0	0	0
HMEI_Wacr29	176.116	0	0.181109	80.031	265.259	205.166	0.327376	32.6542	250.383	191.958	0.125137	0
HMEI_Wacr30	70.8232	14.8127	0.789634	12.7794	96.2006	42.3181	16.5756	20.7422	37.3666	30.7457	37.0914	11.6463
HMEI_Wacr31	822.807	157.387	37.5197	133.886	1108.08	628.928	117.218	172.338	649.576	194.323	469.674	97.0841
HMEI_Wacr32	70.8177	14.8022	0	12.76	96.2074	42.306	0	20.7878	37.2864	30.2419	37.0919	0
HMEI_Wacr33	511.257	175.907	13.5966	59.4542	408.582	336.141	51.5502	79.0944	361.802	399.871	199.979	54.9257
HMEI_Wacr34	511.268	175.91	13.4277	59.4504	408.553	336.115	51.5335	79.2921	361.768	399.847	199.971	54.9126
HMEI_Wacr35	1016.62	877.079	104.217	305.855	2829.66	1029.47	362.692	331.202	1397.07	753.507	636.871	274.946
hyaluronidase_Wacr1	0.340607	11.8942	16.2627	0.546929	13.6739	0	0.021643	9.77118	0.133093	0	0.096964	0
hyaluronidase_Wacr2	12.2732	22.7512	50.7101	35.3915	23.2008	60.8235	63.3865	61.9518	52.1699	41.9972	10.4866	19.4205
hyaluronidase_Wacr3	11.6264	11.9848	13.66	12.7468	11.0225	11.0237	15.8598	14.1572	13.1002	10.4457	12.1331	12.2315
LCI_Wacr	8022.27	8760.35	3939.74	5447.78	2755.14	5100.25	3300.73	1766.74	5986.95	6674.13	2453.17	9038.05
LDTI_Wacr1	13379.3	481.095	3684.25	7034.09	9539.4	1028.88	11715.9	3798.08	792.814	37818.6	313.059	2803.24
LDTI_Wacr2	6.12104	6.88851	2.66318	4.27989	1.44342	7.70768	1.91723	16.8319	9.21974	3.98228	0.245419	16.2147
LDTI_Wacr3	3767.26	464.802	691.115	1496.11	2599.17	569.287	2582.22	1002.27	136.683	6169.83	85.303	448.933
LDTI_Wacr4	17.4367	0	0.391251	1.99227	2.11744	0.403791	4.45472	0.416587	0.247355	56.7355	0	0.415294
LDTI_Wacr5	0.90623	0	0	0.158712	0	0	0	0	0	2.22256	0	0
LDTI_Wacr6	0	0	0	0	0	0	0	0	0	0	0	0
lefaxin_Wacr1	2138.3	1538.62	1096.6	1240.14	1965.19	2077.58	2456.13	1752.59	1528.43	2032.06	1027.57	1654.64
lefaxin_Wacr2	7685.84	9848.86	4814.98	4243.53	8587.75	6176.25	8527.8	9755.9	6719.92	10960.6	6518.01	6623.4
lefaxin_Wacr3	45.6962	49.7245	32.4438	47.4409	63.5925	42.3952	74.8524	73.8513	47.4567	47.1323	52.3307	41.3483
lumbrokinase_Wacr1	0.048465	0.12456	0.037661	0.422471	0	0.194362	0.320499	0.323262	0	0.223924	0.155096	0
lumbrokinase_Wacr2	54.6292	49.2844	37.3996	50.7594	98.7917	56.2112	29.0983	88.6171	30.8091	71.5361	42.6816	31.4494
piguamerin_Wacr1	10699	5450.85	3739.73	3146.98	15476.9	12985.9	1303.46	4166.72	10356.9	2207.19	11066.5	4114.49
piguamerin_Wacr2	33.0623	38.9708	1.31057	4.66195	19.9997	168.384	31.6627	263.613	147.683	72.5716	13.2977	5.31369
piguamerin_Wacr3	163.631	2418.23	99.1746	4657.85	6331.08	51.666	94.2392	69.5019	268.704	688.227	294.061	104.639
progranulin_Wacr	0.055898	0.041151	0.062435	0.048016	0.257062	0.158738	0	0.285011	0.3149	0.041968	0.072815	0.043278
therostasin_Wacr	1764.39	2149.36	2474.42	1141.17	326.793	1003.53	727.651	6.21996	703.588	1248.66	1751.66	1289.05
Note: TPM, transcripts per million; Whitmania acranulata 01-12,Wacr 01-12.
